# Supplementary material
Source: PubMed Central journal article supplement (PMC10123507)
Supplement: mmc1.pdf [file mmc1.pdf]

1 **Artificial intelligence-enabled electrocardiogram to distinguish atrioventricular**  
2 **re-entrant tachycardia from atrioventricular nodal re-entrant tachycardia**

3

4

5

6

**Supplementary material**

## 1 **Supplementary methods**

### 2 **ECG pre-processing**

3  
4  
5 As AVNRT or AVRT should be almost identical on each beat, long recordings are  
6 therefore unlikely to be needed. A 5s segment duration was selected as these  
7 performed better than 10s recordings on preliminary analyses. This is may be  
8 because twice as many 5s recordings are available for training from the same length  
9 recording compared to if 10s input recordings are used. Subsampling the ECG  
10 recording is an established methodology to reduce the number of model parameters  
11 ((1)) and can be seen as a form of data augmentation to allow the network to learn  
12 from the subtle variations in each sub sample. Given the current classification task  
13 was to diagnose arrhythmia mechanisms, ECG durations shorter than 5s were  
14 considered to be too short and therefore were not examined. A detailed comparison  
15 of ideal subsampling durations is beyond the scope of this manuscript.

16  
17 Digital 12-lead ECGs were recorded using the EP recording system (LABSYSTEM™  
18 PRO (Boston Scientific)) as previously described (2). ECGs were downsampled to  
19 200hz as this was the lowest input sampling rate on validation data showed no  
20 differences in model accuracy, therefore 200hz was chosen to reduce the data input  
21 size and number of model parameters, which consequently would reduce training  
22 time. Digital ECG recordings from outside the EP lab were not available, therefore  
23 we were unable to compare performance of the network with ECGs not recording the  
24 EP recording system, however other than the higher original sampling rate there is  
25 no major difference in how the ECG is recorded.

26  
27 Although a 12 lead ECG uses data from only 8 independent leads, all 12 leads were  
28 used as input in our neural network. It is possible that the model training time could  
29 have been shorter when using 8 leads. Given the candidate CNN architectures all  
30 used a 12 lead input, we did not train a model using 8 leads. It may also be possible  
31 to use a further limited number of leads (e.g. 1-4 leads from ambulatory monitoring)  
32 however this was not evaluated in the present study.

### 33 **Architecture selection and hyperparameter optimization**

34  
35  
36 1-dimensional convolutional neural network (CNN) architectures were implemented.  
37 The ECG signal is treated as a 1-dimensional time series with 12 channels. In order  
38 to fairly compare each candidate architecture, Keras tuner was used to perform a  
39 grid search to identify optimal hyperparameters for each architecture. Candidate  
40 architectures were: Zhu et al(3), Hannun et al(4), Attia et al (1), Ribeiro et al (5)  
41 Resnet 18, 34 and 50(6). Resnet 34 and Resnet 50 architectures did not generalise  
42 well during hyperparameter tuning, likely due to their large size, and therefore were  
43 excluded from further testing. Architectures were then compared to identify optimal  
44 performance as shown in supplementary table S1. Where architectures had similar  
45 performance, small networks with fewer parameters were preferred.

46  
47 The final architecture was a modified version of that used by Attia et al (1). Their  
48 neural network architecture was used for a 2 second ECG segment, sampled at  
49 500hz and zero padded to a final length of 1024. In contrast, given that our network  
50 is designed to make a rhythm diagnosis, we elected to use a longer ECG segment.

1 Our network therefore takes an input of a 5 second, sampled at 200hz and zero  
2 padded to a final length of 1024. During hyperparameter tuning, setting dropout to 0  
3 resulted in the highest validation set accuracy. Therefore the dropout layer after the  
4 fully connected layer was removed, which was another difference to the network  
5 architecture of Attia et al. Lastly, the kernel size and number of filters for the last  
6 convolutional layer was not specified. A kernel size of 3 with 128 filters were chosen  
7 for the final convolutional layer in line with common convention of increasing the  
8 number of filters deeper into the network. Importantly, the final architecture was  
9 decided purely based on performance on the validation set.

## 11 **Explainable artificial intelligence predictions**

13 Saliency mapping has been used to explain CNN models ((2, 7, 8)). Grad-CAM is  
14 another method that has been used for this purpose (9). Grad-CAM identifies the last  
15 convolutional layer and investigates the gradients flowing into the layer. This works  
16 well for providing coarse localisation for images where a common kernel size is 5x5.  
17 This method however was not applicable to our model architecture given the small  
18 kernel size of 3 in the last convolutional layer. This kernel size results in the Grad-  
19 CAM mapping being far too coarse to be of any use. Other related methods such as  
20 guided Grad-CAM have been shown to be unreliable (10).

## 22 **Test set**

24 In order to directly compare model performance with the algorithm performance, one  
25 ECG per patient was used in the test as it would not be practical to manually  
26 evaluate a large number of ECGs using the manual algorithm. Additionally, each  
27 ECG segment is likely to be very similar to subsequent segments in the same  
28 patient, therefore the additive value of testing in all segments is likely to be  
29 negligible.

1 **Supplementary figure S1**

2 Flow chart of steps from patient population to prepared ECG inputs.

3 ECG: electrocardiogram; AVNRT: atrioventricular-nodal re-entrant tachycardia;

4 AVRT: atrioventricular re-entrant tachycardia

5  
6  
7  
8

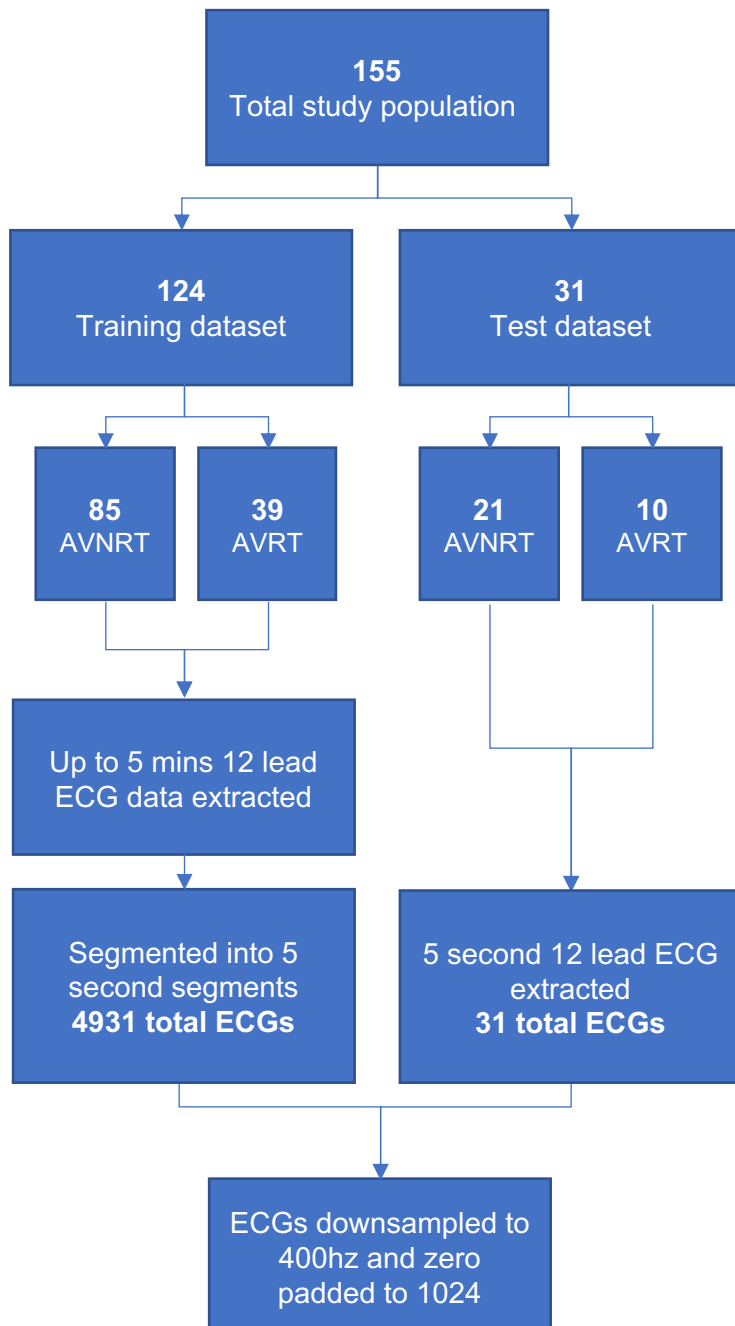

9

1 **Supplementary figure S2**

2 Flow chart of data flow from derivation of training dataset to model training. Testing dataset remains separate throughout and is  
3 used only for model evaluation  
4  
5

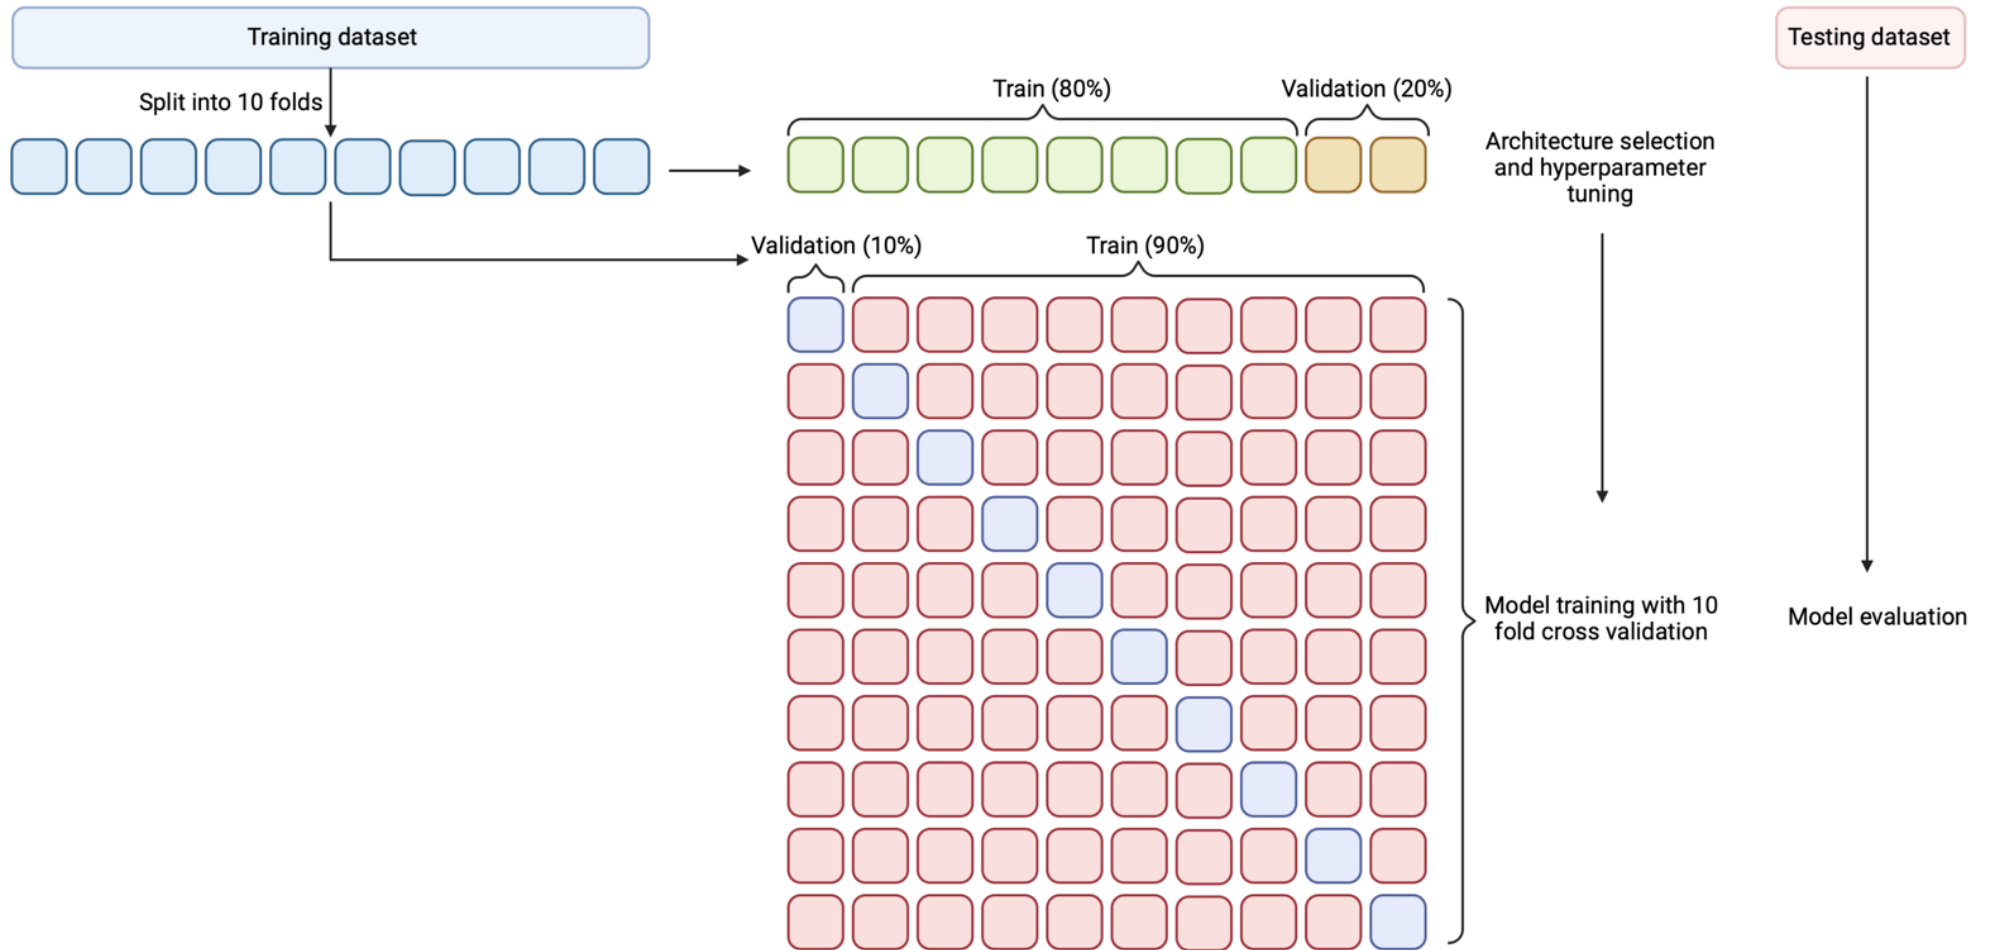

6  
7

1 **Supplementary figure S3**

2 Selected model architecture is shown. Our final network was a modified version of  
3 one used by an Attia et al. (1). It is comprised of a total of 7 convolutional layers with  
4 2 fully connected layers.

5 AVNRT: atrioventricular-nodal re-entrant tachycardia; AVRT: atrioventricular re-entrant  
6 tachycardia; Conv=convolutional layer; ReLU=rectified linear unit; F=number of filters;  
7 S=kernel size; MP=maxpool factor.

8  
9

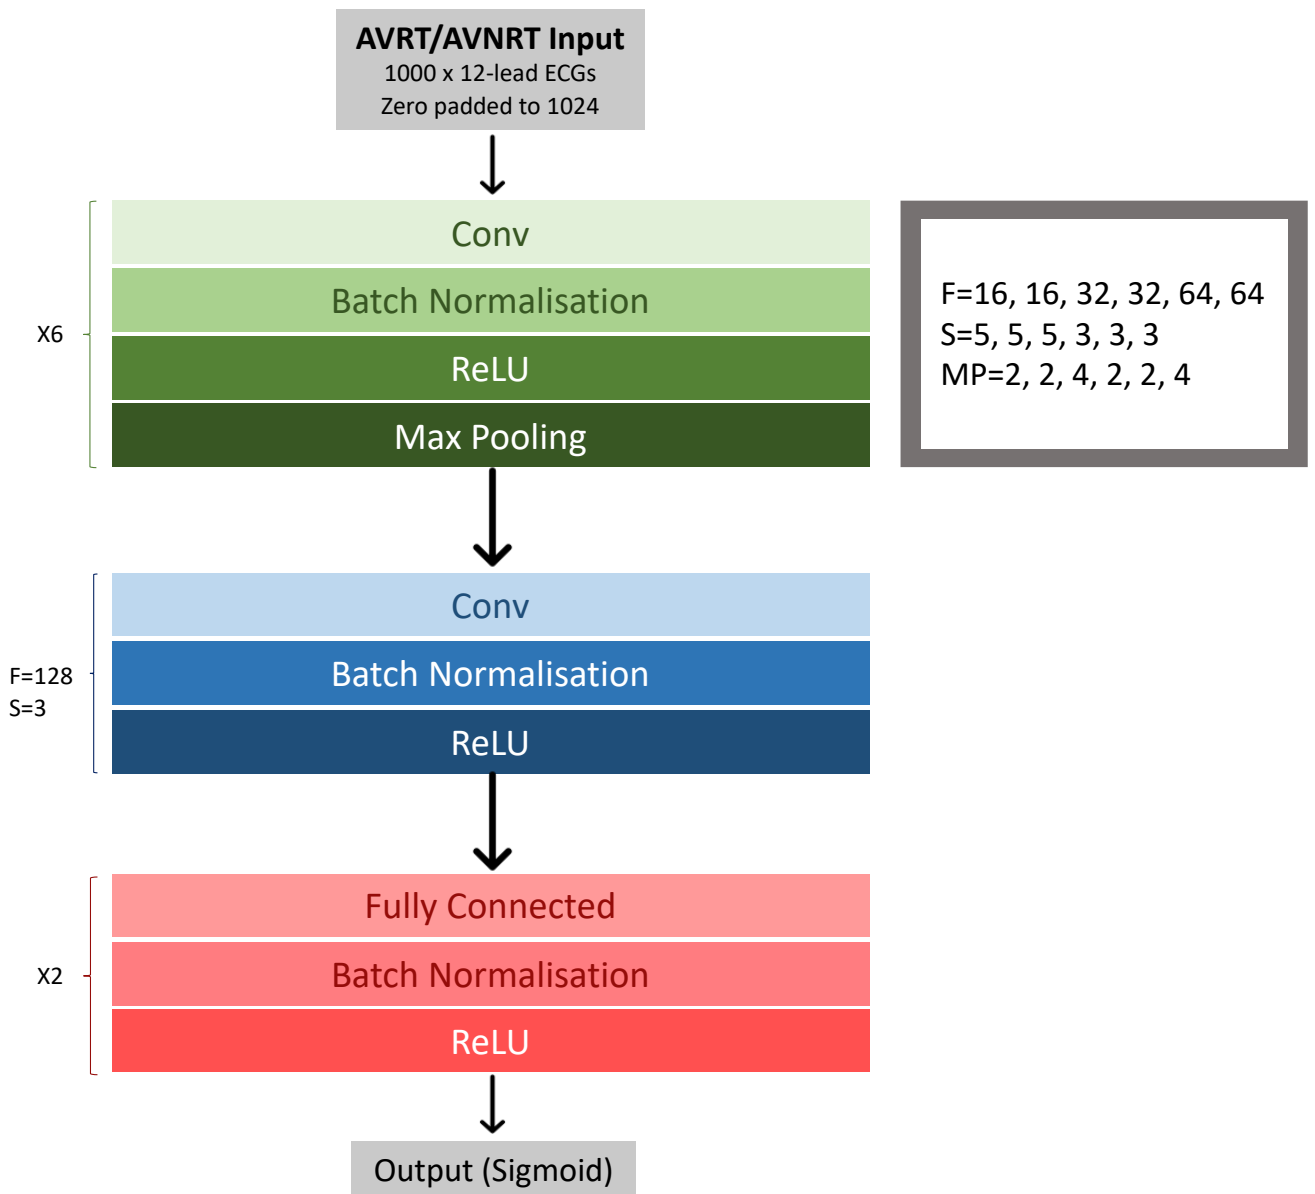

10  
11  
12

- 1 **Supplementary figure S4**
- 2 Algorithm schematic as described by Jaeggi et al. (11)
- 3

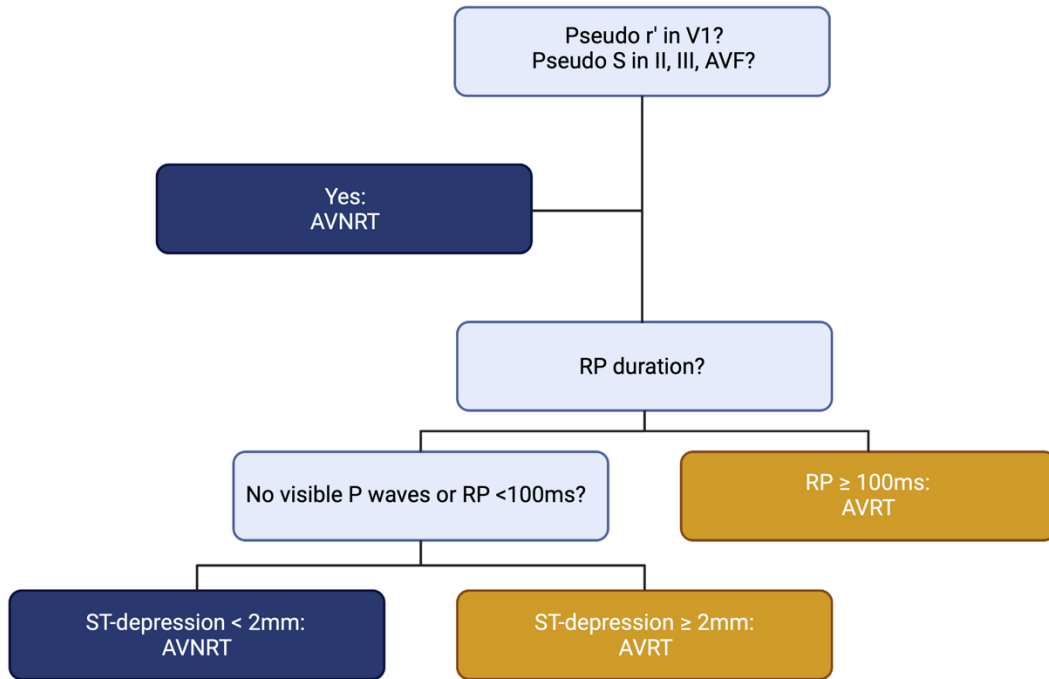

- 4
- 5
- 6

## References

1. Attia ZI, Kapa S, Lopez-Jimenez F, McKie PM, Ladewig DJ, Satam G, et al. Screening for cardiac contractile dysfunction using an artificial intelligence-enabled electrocardiogram. *Nat Med.* 2019;25(1):70-4.
2. Arnold AD, Howard JP, Gopi A, Chan CP, Ali N, Keene D, et al. Discriminating electrocardiographic responses to His-bundle pacing using machine learning. *Cardiovascular Digital Health Journal.* 2020;1(1):11-20.
3. Zhu H, Cheng C, Yin H, Li X, Zuo P, Ding J, et al. Automatic multilabel electrocardiogram diagnosis of heart rhythm or conduction abnormalities with deep learning: a cohort study. *The Lancet Digital Health.* 2020;2(7):e348-e57.
4. Hannun AY, Rajpurkar P, Haghpanahi M, Tison GH, Bourn C, Turakhia MP, et al. Cardiologist-level arrhythmia detection and classification in ambulatory electrocardiograms using a deep neural network. *Nat Med.* 2019;25(1):65-9.
5. Ribeiro AH, Ribeiro MH, Paixao GMM, Oliveira DM, Gomes PR, Canazart JA, et al. Automatic diagnosis of the 12-lead ECG using a deep neural network. *Nat Commun.* 2020;11(1):1760.
6. He K, Zhang X, Ren S, Sun J, editors. *Deep Residual Learning for Image Recognition.* 2016 IEEE Conference on Computer Vision and Pattern Recognition (CVPR); 2016 27-30 June 2016.
7. Cohen-Shelly M, Attia ZI, Friedman PA, Ito S, Essayagh BA, Ko WY, et al. Electrocardiogram screening for aortic valve stenosis using artificial intelligence. *Eur Heart J.* 2021;42(30):2885-96.
8. Lima EM, Ribeiro AH, Paixao GMM, Ribeiro MH, Pinto-Filho MM, Gomes PR, et al. Deep neural network-estimated electrocardiographic age as a mortality predictor. *Nat Commun.* 2021;12(1):5117.
9. Selvaraju RR, Cogswell M, Das A, Vedantam R, Parikh D, Batra D. Grad-CAM: Visual Explanations from Deep Networks via Gradient-Based Localization. *International Journal of Computer Vision.* 2019;128(2):336-59.
10. Adebayo J, Gilmer J, Muelly M, Goodfellow I, Hardt M, Kim B. Sanity checks for saliency maps. *Advances in neural information processing systems.* 2018;31.
11. Jaeggi ET, Gilljam T, Bauersfeld U, Chiu C, Gow R. Electrocardiographic differentiation of typical atrioventricular node reentrant tachycardia from atrioventricular reciprocating tachycardia mediated by concealed accessory pathway in children. *The American Journal of Cardiology.* 2003;91(9):1084-9.
